1 **Shared effect modeling reveals that a fraction of autoimmune disease associations are**  
2 **consistent with eQTLs in three immune cell types**

3 Sung Chun<sup>1,2,3</sup>, Alexandra Casparino<sup>4</sup>, Nikolaos A Patsopoulos<sup>3,5,6</sup>, Damien Croteau-Chonka<sup>2,7</sup>,  
4 Benjamin A Raby<sup>2,7</sup>, Philip L De Jager<sup>2,3,5,6</sup>, Shamil R Sunyaev<sup>1,2,3\*</sup>, and Chris Cotsapas<sup>3,4,8\*</sup>

5 <sup>1</sup>Division of Genetics, Brigham and Women's Hospital, Boston MA, USA

6 <sup>2</sup>Department of Medicine, Harvard School of Medicine, Boston MA, USA

7 <sup>3</sup>Broad Institute of Harvard and MIT, Cambridge MA, USA

8 <sup>4</sup>Department of Neurology, Yale School of Medicine, New Haven CT, USA

9 <sup>5</sup>Department of Neurology, Brigham and Women's Hospital, Boston MA, USA

10 <sup>6</sup>Ann Romney Center for Neurological Diseases, Brigham and Women's Hospital, Boston MA, USA

11 <sup>7</sup>Channing Division of Network Medicine, Brigham and Women's Hospital, Boston MA, USA

12 <sup>8</sup>Department of Genetics, Yale School of Medicine, New Haven CT, USA

13 \* correspondence to SRS ([ssunyaev@rics.bwh.harvard.edu](mailto:ssunyaev@rics.bwh.harvard.edu)) and CC ([cotsapas@broadinstitute.org](mailto:cotsapas@broadinstitute.org))

14 The majority of autoimmune disease risk effects identified by genome-wide association studies (GWAS)  
15 localize to open chromatin with gene regulatory activity. GWAS loci are also enriched for expression  
16 quantitative trait loci (eQTLs), suggesting that most disease risk variants exert their pathological effects  
17 by altering gene expression<sup>1,2</sup>. However, because causal variants are difficult to identify and *cis*-eQTLs  
18 occur frequently, it remains challenging to translate this bulk observation into specific instances of a  
19 disease risk variant driving changes to gene regulation. Here, we use a novel joint likelihood framework  
20 with higher resolution than previous methods to identify loci where disease risk and an eQTL are driven  
21 by a single, shared genetic effect as opposed to distinct effects in close proximity. We find that  
22 approximately 25% of autoimmune disease loci harbor an eQTL driven by the same genetic effect, but  
23 the majority of loci do not. Thus, we uncover a fraction of gene regulatory changes as strong  
24 mechanistic hypotheses for disease risk, but conclude that most risk mechanisms do not involve  
25 changes to basal gene expression.

26 The autoimmune and inflammatory diseases (AID) – multiple sclerosis, type 1 diabetes, inflammatory  
27 bowel disease, and more than 80 others – are highly heritable, complex diseases that cumulatively  
28 afflict 8% of the population<sup>3,4</sup>. Pathology is driven by loss of tolerance to self-antigens, resulting in either  
29 systemic or tissue-specific immune attack. They are extensively co-morbid<sup>5,6</sup> with extensive sharing of  
30 AID genetic risk<sup>7-9</sup>, indicating that pathogenic mechanisms are also shared<sup>10</sup>. Disease mechanisms are  
31 still poorly understood, so current therapies control symptoms rather than root causes, often by  
32 suppression of major immune responses. Consortium-driven genetic mapping studies have identified  
33 hundreds of genomic regions mediating risk to several AID, and these communities have collaborated  
34 to develop the ImmunoChip custom genotyping array to deeply interrogate 185 of these loci<sup>11</sup>.

35 These disease associations are primarily non-coding: lead GWAS SNPs are more likely to be  
36 associated with expression levels of neighboring genes than expected by chance<sup>12</sup>, and the same lead  
37 SNPs are enriched in regulatory regions marked by chromatin accessibility and modification<sup>1,13</sup>. Fine-  
38 mapping reveals enrichment of AID-associated variants in enhancer elements specifically active in  
39 stimulated T cell subpopulations<sup>14</sup>, and formal disease heritability partitioning analyses also show  
40 strong enrichment in such regions of gene regulatory potential<sup>15,16</sup>. Collectively, these strands of  
41 evidence suggest that the majority of disease risk is mediated by changes to gene regulation in specific  
42 cell subpopulations. However, these bulk overlap and enrichment analyses do not formally assess  
43 whether expression levels and disease risk are associated to the same underlying variant or are due to

1 independent effects in the same region<sup>17,18</sup>. Several methods have been developed to identify  
2 pathogenic genes within GWAS loci relying on eQTL co-localization<sup>19-22</sup>. However, these are limited in  
3 resolution to detect situations where causal variants for the disease trait and the eQTL are distinct but  
4 in linkage disequilibrium.

5 Here, we present an approach to test if a GWAS risk association and an eQTL are driven by the same  
6 underlying genetic effect, accounting for the LD between causal variants. Using data from ImmunoChip  
7 studies of seven AID comprising >180,000 samples in total (Table S2), we apply this approach to test if  
8 associations in 272 known risk loci are consistent with *cis*-eQTL for genes in each region, measured in  
9 three relevant immune cell populations: lymphoblastoid cell lines (LCLs), CD4<sup>+</sup> T cells and CD14<sup>+</sup>  
10 monocytes<sup>23,24</sup>.

11 When associations to two traits in a locus – here, a disease trait and an eQTL – are driven by the same  
12 underlying causal variant, the joint evidence of association should be maximized at the markers in  
13 tightest LD with the (potentially unobserved) causal variant<sup>18,25</sup>. Here, we directly evaluate the joint  
14 likelihood that both trait associations are due to the same underlying causal variant (Figure S1), unlike  
15 previous approaches that look for similarities in the shape of the association curve over multiple  
16 markers<sup>19,20,26,27</sup>. We expect that when the underlying causal effect is shared, joint likelihood is  
17 maximized when we model the same causal variant in both traits; conversely, when the underlying  
18 causal variants are different, we expect maximum joint likelihood when we model their closest proxies.  
19 We empirically derive the null distribution of the joint likelihood ratio statistic by comparing disease  
20 associations to permuted eQTL data. The resulting *P* value is asymptotically conservative against the  
21 null of distinct causal variants, as the likelihoods of two competing models will be further contrasted with  
22 increasing sample and effect sizes (Supplementary Notes). We are thus able to directly evaluate  
23 whether associations in the same genomic locus for two traits, observed in different cohorts of  
24 individuals, are due to the same underlying causal variant.

25 To assess the performance of our method, we benchmarked it against *coloc*<sup>19</sup>, a well-calibrated  
26 Bayesian framework that considers spatial similarities in association data across windows of markers in  
27 a locus. We simulated pairs of case-control cohorts with either the same or distinct causal variants  
28 driving association in each. Though both methods had excellent performance in simulations where the  
29 two distinct causal variants are in complete linkage equilibrium (AUC=0.99 for both when  $r^2 < 0.5$ ),  
30 compared to *coloc* we found that our method maintained higher specificity even as the linkage  
31 disequilibrium between distinct causal variants became high (AUC = 0.92 compared to 0.70 for *coloc*  
32 when  $0.7 < r^2 < 0.8$ ; Figure S3, Tables S3 and S4). In practice, our resolution becomes limited at very  
33 high LD levels ( $r^2 > 0.8$ ), and we are unable to reliably distinguish between two causal variants in very  
34 high LD and a single causal variant associated to both traits. Thus, within these limits, we can  
35 accurately detect cases of shared genetic effects between two traits.

36 We first identified densely genotyped ImmunoChip loci showing strong association to each disease  
37 from publicly available summary data (immunobase.org; Table 1). These include associations to both  
38 Crohn disease and ulcerative colitis, collectively designated inflammatory bowel disease, and to each  
39 disease alone<sup>28</sup>. Due to the extensive LD and complex natural selection present in the Major  
40 Histocompatibility Locus, we excluded this region from consideration. We next identified genes in a  
41 1Mb window centered on the most associated variant in each locus. Consistent with previous  
42 observations that eQTLs are frequently found in GWAS loci, we found that all loci but 11 had at least  
43 one gene with an eQTL ( $p < 0.05$ ) in at least one of the three cell types, with most such effects common  
44 across all three tissues (Table 1). In total, we found 9,268 pairs of disease and eQTL associations  
45 across 261 ImmunoChip loci. We then tested each of these pairs with our joint association likelihood  
46 method to assess if the eQTLs appear driven by the same underlying effect as the disease  
47 associations. We find evidence for shared effects for only 57/9,268 pairs in 41/261 loci across all

1 diseases, with the proportion varying from 2/40 (5%) for type 1 diabetes loci to 4/10 (40%) for ulcerative  
2 colitis loci (false discovery rate < 5%; Tables 1 and 2). Of these 57 shared effects, 43 pass even the  
3 more stringent family-wise multiple testing correction (Bonferroni corrected  $P < 0.05$ ). Thus, our  
4 analysis reveals that in the majority of AID loci, variants causally involved in disease phenotypes do not  
5 overlap variants responsible for eQTL signals. Overall, we find that only a small minority of tested  
6 disease-eQTL pairs in the same locus show any evidence of a shared association, whereas >75%  
7 show evidence of being driven by distinct genetic variants in the same locus (Figure 1).

8 We sought to explain this lack of overlap between disease associations and eQTLs, despite their  
9 frequent co-occurrence in the same loci. In particular, although our method showed good performance  
10 in simulated data (Figure S4), we remained concerned that this lack of overlap may be due to low  
11 statistical power in the eQTL data, which come from cohorts of limited sample size. However, we find  
12 that even amongst the most strongly supported eQTLs ( $p < 10^{-5}$ ), <25% show evidence of shared  
13 effects with disease associations. Conversely, we find strong evidence for distinct effects for the  
14 majority of disease-eQTL pairs, with only a subset of comparisons being ambiguous, suggesting that  
15 our method is adequately powered to detect shared effects where they exist (Figures 1a and S11-13).  
16 To assess whether power affects the total number of loci, rather than eQTL, that can be resolved, we  
17 looked more deeply at our significance threshold settings. We find that more liberal thresholds do not  
18 increase the number of true positive results after adjusting for false positive rate, indicating that most  
19 loci do not contain *any* gene with an eQTL consistent with the disease association (Figures 1b and  
20 S14). Cumulatively, our results demonstrate that only a minority of AID risk effects drive eQTLs in the  
21 three cell populations we tested, which are drawn from diverse lineages of the immune system.

22 We next focused on the subset of 57 disease/eQTL pairs in 41 loci where we could detect strong  
23 evidence of a shared effect (Table 2). We find that 51/57 (89%) of effects are restricted to one cell  
24 population, indicating that tissue-specific eQTLs are important components of the molecular  
25 underpinnings of disease (Figures S5 and S6). The remaining six effects are detected in multiple cell  
26 populations; for example, the multiple sclerosis association at rs10783847 on chromosome 12 is  
27 consistent with eQTLs for the transcript of methyltransferase-like 21B (*METTL21B*) in both CD4<sup>+</sup> T cells  
28 and CD14<sup>+</sup> monocytes, but not with eQTLs for the remaining 38 genes in the immediate locus (Figure  
29 2). Although *METTL21B* is expressed in LCLs, there is no evidence of an eQTL in this tissue within  
30 1Mb from rs10783847. Similarly, for the multiple sclerosis association at rs1966115 on chromosome 8  
31 and eQTLs for *ZC2HC1A*, and for the inflammatory bowel disease association at rs55770741 on  
32 chromosome 5 and eQTLs for *ERAP2*, we detect a shared effect in all three cell populations. In several  
33 cases we find tissue-specific shared effects despite strong eQTLs for the same gene in other tissues:  
34 for *TUFM* and inflammatory bowel disease risk at rs12448902 on chromosome 16, we find shared  
35 effects in CD4<sup>+</sup> and CD14<sup>+</sup> but not LCLs, where we see a *TUFM* eQTL at  $p = 0.01$  (joint likelihood  $P =$   
36  $0.97$ ). For *ZFP90* and ulcerative colitis risk at rs889561 on chromosome 16, we also find shared effects  
37 in CD4<sup>+</sup> and CD14<sup>+</sup> but not LCLs, where we observe a *ZFP90* eQTL at  $p = 0.005$  that has a low  
38 likelihood of shared effect with GWAS (joint likelihood  $P = 0.95$ ). Instead, we find evidence of sharing  
39 between disease risk and an eQTL for *NFAT5* in LCLs. Thus, despite the presence of eQTLs for a gene  
40 in multiple tissues, not all these effects are consistent with disease associations suggesting that  
41 disease-relevant eQTLs are tissue specific.

42  
43 Among our findings are cases where an eQTL is consistent with associations to multiple diseases. For  
44 example, the ankyrin repeat domain 55 (*ANKRD55*) transcript encoded on chromosome 5 has an eQTL  
45 in CD4<sup>+</sup> T cells that is shared with proximal associations to multiple sclerosis, Crohn disease and  
46 rheumatoid arthritis (Figure 3, all observations are significant after Bonferroni correction). We also find  
47 weaker evidence for shared effects between all three diseases and an eQTL for interleukin 6 signal  
48 transducer (*IL6ST*) in CD4<sup>+</sup> T cells, which passes the false discovery rate threshold but not the more  
49 stringent Bonferroni correction (Figure S7). Similarly, a CD4<sup>+</sup> eQTL for *ELMO1* on chromosome 7 is

1 consistent with associations to both celiac disease and multiple sclerosis (Figure S8), a CD14<sup>+</sup> eQTL  
2 for *RGS1* on chromosome 1 is consistent with associations to both celiac disease and multiple sclerosis  
3 (Figure S9), and a CD14<sup>+</sup> eQTL for *UBE2L3* on chromosome 22 is consistent with associations to both  
4 celiac disease and inflammatory bowel disease (Figure S10). In all cases, these are the only genome-  
5 wide significant disease associations reported in these loci. As we consider each disease association  
6 independently, these results indicate that the same underlying risk variants drive risk to multiple  
7 diseases in these loci by altering gene expression, consistent with observations of shared effects  
8 across diseases<sup>7</sup>.

9  
10 Overall, our results suggest that some autoimmune and inflammatory disease loci are consistent with  
11 eQTLs acting in specific immune cell subpopulations, which form strong mechanistic hypotheses for the  
12 molecular mechanisms driving disease risk. However, these only account for a small fraction of eQTLs  
13 present in disease risk loci; this suggests that abundant caution must be exercised before inferring  
14 pathological relevance for an observed eQTL simply due to proximity to a disease association. Strong  
15 evidence of a shared genetic effect should therefore be established prior to embarking on time-  
16 consuming and costly experimental dissection of such effects.

17 Previous efforts to detect shared effects between traits in specific loci rely on conditional analyses<sup>29</sup> or  
18 indirectly leverage linkage disequilibrium to test if the shape of association peaks in the region are  
19 similar<sup>19,26,27,30</sup>. In contrast, we directly evaluate whether the data support a shared effect through joint  
20 likelihood estimation. Through this direct evaluation, we are able to resolve cases where the  
21 associations are proximal with higher resolution (Figure S3, Tables S3 and S4). As our method is  
22 general, we suggest it may be useful in other contexts, for example in establishing if the shared  
23 heritability between diseases is driven by the same underlying causal effects<sup>31</sup>.

24 More broadly, our results raise the question of how causal disease variants alter cell function to induce  
25 risk, given the strong enrichment of disease risk signal on regions of chromatin accessibility with gene  
26 regulatory potential<sup>1</sup>, and gene enhancers in particular<sup>14</sup>. We suggest that although gene regulatory  
27 regions harboring risk variants are accessible in multiple immune cell subpopulations, they may control  
28 gene expression in either a tissue-specific or condition-specific manner, which is not manifest in all cell  
29 populations. Our results therefore reinforce the view that we must seek the appropriate cell type and  
30 physiological conditions in order to capture the pathologically relevant gene regulatory changes driving  
31 disease risk.

## 32 33 **Methods**

34 **Simulated dataset.** We selected two loci with previously known associations to base our positive and  
35 negative simulations: CD58 on chromosome 1, rs667309 associated to MS risk<sup>32</sup>, and ATG16L1 on  
36 chromosome 2, rs2241880 associated to IBD<sup>33</sup>. In each, we used Hapgen<sup>34</sup> and phased base  
37 haplotypes of the locus ( $2n=112$ , downloaded from  
38 [http://mathgen.stats.ox.ac.uk/impute/impute\\_v2.html](http://mathgen.stats.ox.ac.uk/impute/impute_v2.html)) to simulate up to ten cohorts, each with 1,000  
39 cases and 1,000 controls, and up to 90 cohorts with other causal variants (Table S1). We chose these  
40 other variants to have a range of LD to rs667309 or rs2241880, so we could assess the LD resolution  
41 of our joint likelihood method. In each cohort, we simulated genotypes for all variants within 2Mb of  
42 rs667309 or rs2241880. To make the cohorts comparable to each other, we adjusted the effect sizes of  
43 causal SNPs at different MAF to maintain full power in each simulated cohort.

44  
45 The pairs of simulated cohorts were used either as positive controls if they simulate the same causal  
46 variant and negative controls otherwise, to assess the LD resolution limits of our method. Cohort pairs  
47 simulating distinct causal variants in high LD ( $r^2 > 0.8$ ) were excluded. For each pair, one cohort was

1 treated as the primary trait (i.e. a disease GWAS) and the other as a secondary trait (i.e. eQTL). Due to  
2 the nature of the coalescent forward simulation model, 7.7% of simulated cohorts showed peak  
3 association to a SNP in only moderate LD with the specified causal variant ( $r^2 < 0.8$ ). We kept these  
4 cohorts as secondary traits only, to better capture the vagaries of resolution limits inherent in the small  
5 sample size of eQTL studies. In total, we generated 1,629 cohort pairs for positive controls simulating  
6 the same causal variant and 6,106, 530, and 160 cohort pairs for negative controls for which distinct  
7 causal variants are separated by  $r^2$  of 0 – 0.5, 0.5 – 0.7, and 0.7 – 0.8, respectively.

8  
9 **Disease GWAS datasets.** We downloaded association summary statistics for type 1 diabetes (T1D),  
10 rheumatoid arthritis (RA), celiac disease (CEL), multiple sclerosis (MS), inflammatory bowel disease  
11 (IBD), Crohn's disease (Crohn), and ulcerative colitis (UC) from ImmunoBase (immunobase.org; Table  
12 S2). For MS, we used the association statistics derived from the combined cohort of discovery and  
13 validation samples<sup>8</sup> in order to maximize the sample size and genetic resolution. For IBD, Crohn, and  
14 UC, summary data are from European subset of a trans-ethnic association stud<sup>28</sup>. All association data  
15 are solely based on ImmunoChip samples and do not include imputed genotypes. To address  
16 population structure, we limited our analyses to European subjects only with the exception of RA<sup>35</sup>,  
17 which includes 620 Punjab individuals out of a total of 27,345. T1D summary statistics are from the  
18 meta-analysis between case/control association and affected sib-pair analysis.

19  
20 As our method works best on dense genotype data, we restricted our analyses to the 188 loci  
21 genotyped at high density on ImmunoChip. We excluded the Major Histocompatibility Complex (MHC)  
22 locus, due to the complex landscape of selection and resulting complex LD patterns. For each disease,  
23 we sought the largest published genetic mapping study and identified genome-wide significant  
24 associations reported in the 188 ImmunoChip loci. We note that these reports may contain additional  
25 samples, so the associations may not be genome-wide significant in the ImmunoChip studies alone.  
26 We also excluded any secondary associations after conditioning on initial results, as these are  
27 inconsistently reported across diseases. If multiple independent associations are reported within the  
28 same ImmunoChip region for any disease, we divide the region at the mid-point between the reported  
29 markers and select lead SNPs in each sub-interval separately.

30  
31 **eQTL dataset.** We examined eQTLs in lymphoblastoid cell lines<sup>23</sup> (LCLs) and primary CD4<sup>+</sup> T cells and  
32 CD14<sup>+</sup> monocytes<sup>24</sup> obtained from healthy donors (Table S2). For LCLs, we obtained imputed  
33 genotypes and normalized RNAseq in RPKM for 278 non-Finnish European donors in the Geuvadis  
34 project. We removed SNPs with minor allele frequency ( $< 5\%$ ), high probability of Hardy-Weinberg  
35 disequilibrium ( $P_{HW} < 10^{-5}$ ), or high genotype missing rate ( $>5\%$ ). We removed pseudogenes and  
36 transcripts without assigned gene symbols from the expression data, and calculated association  
37 statistics by linear regression of genotype on expression levels, including three population principal  
38 components to control for structure<sup>36,37</sup>. For CD4<sup>+</sup> and CD14<sup>+</sup>, we regressed normalized expression  
39 levels for European Americans ( $n=213$  and 211, respectively) on similarly QCed imputed allele  
40 dosages. For all cell types, we generated adaptive permutation statistics from  $10^3$  up to  $10^6$  iterations<sup>36</sup>,  
41 using all covariates.

42  
43 **Joint likelihood mapping (JLIM).** To test the hypothesis that association signals for two traits are  
44 driven by the same causal variant, we contrasted the joint likelihood of observed association statistics  
45 under the assumption of same compared to distinct causal variant. Due to limited genetic resolution,  
46 distinct causal variants were defined by separation in LD space by  $r^2 < \theta$  from each other. The limit of  
47 genetic resolution  $\theta$  is a user-specified parameter and was set to 0.8 in this study. We assumed that at  
48 most one causal variant was present in the locus for each trait and that no samples overlap between  
49 the traits. We designed the joint likelihood mapping (JLIM) statistic  $\lambda$  in an asymmetrical fashion,  
50 requiring only summary-level statistics for one trait (primary trait) but genotype-level data for the other  
51 (secondary trait). Specifically,  $\lambda$  was defined as the sum of log likelihood that the causal variant

1 underlying secondary trait is more likely to be same as than distinct from the variant underlying primary  
 2 trait, as integrated over a set of likely causal variants under a GWAS peak of primary trait:  
 3

$$\Lambda = \sum_{i \in \mathcal{N}_{\theta}^1(m^*)} L_1(i) \cdot \log \frac{L_1(i)L_2(i)}{\max_{j \notin \mathcal{N}_{\theta}^2(i)} L_1(i)L_2(j)}$$

$$= \sum_{i \in \mathcal{N}_{\theta}^1(m^*)} L_1(i) \cdot (\log L_2(i) - \max_{j \notin \mathcal{N}_{\theta}^2(i)} \{\log L_2(j)\})$$

4

5 where  $m^*$  is the most associated SNP for primary trait,  $L_1(i)$  and  $L_2(i)$  are the likelihood of SNP  $i$  being  
 6 causally associated with primary and secondary traits, respectively, and  $\mathcal{N}_{\theta}^1(i)$  and  $\mathcal{N}_{\theta}^2(i)$  are the sets  
 7 of SNPs within LD neighborhood around SNP  $i$ , as defined by  $\{SNP j \mid r_{i,j}^2 > \theta\}$ . We derived  $\mathcal{N}_{\theta}^1$  from  
 8 the reference LD panel and  $\mathcal{N}_{\theta}^2$  directly from the genotypes of secondary trait cohort. We used disease  
 9 outcome as primary trait, leveraging the larger sample size and dense genotyping, and gene  
 10 expression as secondary trait, taking advantage of the availability of individual genotype data.  
 11  
 12

13

14 We calculated the likelihood of causal association by approximating the local LD structure with pairwise  
 15 correlation as previously described<sup>38,39</sup>. Briefly, when SNP  $c$  is the only causal variant in the locus with  
 16 non-centrality  $\lambda_c$ , the association static  $z_i$  of non-causal SNP  $i$  follows a normal distribution  $N(r_{i,c} \lambda_c, 1)$ ,  
 17 where  $r_{i,c}$  is LD between SNPs  $i$  and  $c$  measured in pairwise Pearson correlation of genotypes. In  
 18 general, when association statistics  $\mathbf{Z} = (z_1, z_2, \dots, z_M)^T$  are provided for all  $M$  SNPs in the analysis  
 19 window, the likelihood of SNP  $i$  being the causal variant with non-centrality  $\lambda_i$  is:

19

$$L(\mathbf{Z}; \lambda_i \neq 0) = \phi_{MVN}(\mathbf{Z}; \text{mean} = \Sigma(\lambda_i \circ \mathbf{C}), \text{var} = \Sigma)$$

20

21 where  $\phi_{MVN}$  is the multivariate normal density function,  $\mathbf{C}$  is an incident vector with  $C_k = 1$  if and only if  
 22  $k = i$ ,  $\Sigma$  is a  $M \times M$  local LD matrix defined by pairwise Pearson correlation between genotypes, and  $\circ$   
 23 is element-wise multiplication [Kichaev]. Since we do not know the true non-centrality of causal variant,  
 24 we estimated the profile likelihood, which simplifies to a closed form:  
 25

25

$$\log L(\mathbf{Z}; \lambda_i^{mle}) = \frac{1}{2} (-\mathbf{Z}^T \Sigma^{-1} \mathbf{Z} + z_i^2) - \frac{1}{2} \log((2\pi)^M |\Sigma|)$$

26

27 with  $\lambda_i^{mle} = z_i$ . Thus, given association statistics for primary and secondary traits,  $\mathbf{Z} = (z_1, z_2, \dots, z_m)^T$   
 28 and  $\mathbf{W} = (w_1, w_2, \dots, w_m)^T$ , the test statistic  $\Lambda$  simplifies to:

29

$$\Lambda = \sum_{i \in \mathcal{N}_{\theta}^1(m^*)} e^{\frac{1}{2}(z_i^2 - z_{m^*}^2)} \cdot (w_i^2 - \max_{j \notin \mathcal{N}_{\theta}^2(i)} w_j^2)$$

30

31 The p-value of joint likelihood is estimated by permuting phenotypes of secondary traits as under the  
 32 trivial null hypothesis that that there is no casual variant for secondary trait in the locus (" $H_0$ "). With  
 33 respect to the more likely null that distinct causal variants underlie association signals of two traits  
 34 (" $H_2$ "), we can show that asymptotically as the non-centrality of causal variant increases, p-values  
 35 estimated from  $H_0$  behave conservatively with respect to  $H_2$  (Supplementary Notes):  
 36

$$P_{JLIM} = P(\Lambda \geq l | H_0) \geq P(\Lambda \geq l | H_2)$$

1  
2 Thus, with large enough sample or effect sizes, joint likelihood test against  $H_0$  will also reject  $H_2$  in favor  
3 of alternative hypothesis of shared causal variant (“ $H_1$ ”). Further, to evaluate whether this property  
4 holds for practical non-centrality values, we examined the negative controls simulating  $H_2$  in ATG16L1  
5 and CD58 loci, specifically, if  $P_{JLIM}$  was highly shifted toward 1.0 (Figure S2) and larger than empirically  
6 estimated false positive rates as expected (Table S4).

7  
8 For both simulated and real GWAS data, we applied JLIM to SNPs with data for both primary and  
9 secondary traits, present in the reference LD panels, and within 100kb of the most associated marker to  
10 disease (“lead SNP”). In ImmunoChip data, the analysis windows were further confined by the  
11 boundaries of the fine-mapping intervals. We compared each lead SNP to eQTL data for all genes with  
12 a transcription start sites (TSS) up to 1Mb from the lead SNP, and an eQTL association  $p < 0.05$  for at  
13 least one SNP in the analysis window. To minimize computational burden, we did not consider SNPs  
14 associated with neither disease or eQTL (association  $p > 0.1$  to both). For the reference LD panel, we  
15 used the base haplotypes of Hapgen simulation for simulated datasets, and non-Finnish European  
16 samples ( $n=404$ ) of the 1000 Genomes Project (phase 3, release 2013/05/02) for ImmunoChip loci.

17  
18 We corrected for multiple tests using false discovery rate (FDR) levels and Bonferroni correction. The  
19 FDR was calculated separately for specific disease and cell type combination as:

$$FDR(p) = \frac{p N}{\#\{P_{JLIM} \leq p\}}$$

20  
21  
22 where  $p$  is a JLIM p-value cut-off, and  $N$  is the number of all tested disease lead SNP-eQTL candidate  
23 gene combinations. The FDR was calculated for each cell type since the distribution of JLIM p-values  
24 can vary depending on the disease relevance of cell type. To provide a list of higher confidence hits in  
25 each disease, we also applied the Bonferroni correction to nominal JLIM p-values for the number of  
26 tests across all three cell types.

27  
28 **Bayesian coloc.** We ran Bayesian *coloc*<sup>19</sup> using default parameter settings on both simulated and real  
29 data as described for JLIM. For simulated data, we used colocalization prior  $p_{12}$  values of  $10^{-5}$  or  $10^{-6}$ ,  
30 which are default values for higher sensitivity and higher specificity, respectively. The beta and variance  
31 of beta were used for all SNPs in the analysis window in case/control mode. We calculated accuracy as  
32 the area under the receiver operator curve (ROC; Figure S3).

33  
34 As ImmunoChip data is only available as summary statistics, we used the minor allele frequencies from  
35 non-Finnish Europeans from the 1000 Genomes Project, and quantitative beta and variance of beta  
36 calculated on eQTL association data, and a colocalization prior  $p_{12} = 10^{-6}$ . We did not consider the type  
37 1 diabetes data, where case/control sample size is limited after excluding affected sib pair data.

38  
39 **Estimating the number of disease GWAS loci with consistent eQTL effects.** We expect JLIM p-  
40 values to follow a bimodal distribution with modes close to zero and one when the data support a model  
41 of shared or distinct causal effects, respectively. Conversely, under the null model of no *cis*-eQTL  
42 association, we expect a uniform p-value distribution. We can thus estimate the proportion disease-  
43 eQTL pairs belonging to the null  $\pi_0$ , same  $\pi_1$  and distinct  $\pi_2$  causal variant models from the observed  
44 p-value distribution<sup>40</sup> (Figures S11-13). To assess if the strength of the eQTL association influences the  
45 likelihood of identifying a shared causal variant, we calculate these proportions for subsets of trait pairs  
46 defined by minimum eQTL p-value. In each bin, we identified the limits of the uniform portion of the  
47 distribution  $\gamma_1$  and  $\gamma_2$  and estimate  $\pi_0$ ,  $\pi_1$ , and  $\pi_2$  as:

1

$$\pi_0 = \frac{\#\{\gamma_1 < P_{JLIM} < \gamma_2\}}{(\gamma_2 - \gamma_1)N}$$

2

$$\pi_1 = \frac{\#\{P_{JLIM} \leq \gamma_1\}}{N} - \gamma_1 \pi_0$$

3

$$\pi_2 = \frac{\#\{P_{JLIM} \geq \gamma_2\}}{N} - (1 - \gamma_2)\pi_0$$

4

5 To estimate the number of disease GWAS loci that can be explained by consistent effect of same  
6 causal variant on disease and eQTL (denoted by  $\mathcal{C}$  below), we incrementally relaxed the p-value cut-  
7 offs of JLIM and examined the trends of the number of disease loci with at least one JLIM hit and  
8 subtracted the expected number of false positive loci (Figures 1 and S14). Specifically, at each JLIM p-  
9 value cutoff  $p_i$ , we successively calculated  $\mathcal{C}(p_i)$ :

10

$$\mathcal{C}(p_i) = \mathcal{C}(p_{i-1}) + |\mathcal{D}(p_i) \cap \mathcal{D}(p_{i-1})^c| - \sum_{d \in \mathcal{D}(p_{i-1})^c} \mathcal{E}(d, p_i) + \sum_{d \in \mathcal{D}(p_{i-1})^c} \mathcal{E}(d, p_{i-1})$$

11

12 where  $p_{i-1} < p_i$  with  $p_0 = 0$ ,  $\mathcal{D}(p)$  is the set of disease GWAS loci with at least one eQTL gene in any  
13 cell type passing the JLIM p-value cut-off  $p$ , and  $\mathcal{E}(d, p)$  is the probability that disease GWAS locus  $d$   
14 has a false positive eQTL gene passing the JLIM p-value cutoff  $p$ . We estimated the lower and upper  
15 bounds of  $\mathcal{E}(d, p)$  using the Monte Carlo method by randomly selecting false positive eQTL genes  
16 within the locus  $d$  at rates of  $(1 - \pi_1) \cdot lb$  or  $(1 - \pi_1) \cdot ub$  over 1,000 iterations. The  $lb$  and  $ub$  are the  
17 lower and upper bounds of false positive rate of JLIM against true null. Note that  $\pi_1$  and  $lb$  depend on  
18 the cell type and strength of eQTL association.

19

20 As the true null is mixture of two nulls,  $H_0$  and  $H_2$ , the false positive rate of JLIM against true null  
21  $P(\Lambda \geq l | H_0 \cup H_2)$  can be bounded by using the following decomposition:

22

$$P(\Lambda \geq l | H_0 \cup H_2) = P(\Lambda \geq l | H_0) \frac{P(H_0)}{P(H_0) + P(H_2)} + P(\Lambda \geq l | H_2) \frac{P(H_2)}{P(H_0) + P(H_2)}$$

23

24 While the false positive rate under distinct null  $P(\Lambda \geq l | H_2)$  is difficult to estimate, it is non-negative by  
25 definition and asymptotically bounded by permutation p-value  $P(\Lambda \geq l | H_0)$ , i.e.  $P_{JLIM}$ , as the non-  
26 centrality of causal variant increases. Therefore, we took:

27

$$ub = P_{JLIM}$$

28

$$lb = P_{JLIM} \frac{\pi_0}{\pi_0 + \pi_2} = P_{JLIM} \frac{\pi_0}{1 - \pi_1}$$

29

30 and estimated the bounds of locus-level false positive rates  $\mathcal{E}(d, p)$  and number of disease loci with  
31 consistent effects  $\mathcal{C}(p_i)$ .

32

33



## 1 Bibliography

- 2
- 3 1. Maurano, M. T. *et al.* Systematic Localization of Common Disease-Associated Variation in  
4 Regulatory DNA. *Science* **337**, 1190–1195 (2012).
- 5 2. Bernstein, B. E. *et al.* The NIH Roadmap Epigenomics Mapping Consortium. *Nat Biotechnol* **28**,  
6 1045–1048 (2010).
- 7 3. Walsh, S. J. & Rau, L. M. Autoimmune diseases: a leading cause of death among young and  
8 middle-aged women in the United States. *Am J Public Health* **90**, 1463–1466 (2000).
- 9 4. Autoimmune Diseases Coordinating Committee. *Report of the Autoimmune Diseases*  
10 *Coordinating Committee*. (American Autoimmune Related Diseases Association (AARDA) &  
11 National Coalition of Autoimmune Patient Groups (NCAAPG), 2011).
- 12 5. Eaton, W. W., Rose, N. R., Kalaydjian, A., Pedersen, M. G. & Mortensen, P. B. Epidemiology of  
13 autoimmune diseases in Denmark. *Journal of Autoimmunity* **29**, 1–9 (2007).
- 14 6. Criswell, L. A. *et al.* Analysis of families in the multiple autoimmune disease genetics consortium  
15 (MADGC) collection: the PTPN22 620W allele associates with multiple autoimmune phenotypes.  
16 *AJHG* **76**, 561–571 (2005).
- 17 7. Cotsapas, C. *et al.* Pervasive Sharing of Genetic Effects in Autoimmune Disease. **7**, e1002254  
18 (2011).
- 19 8. International Multiple Sclerosis Genetics Consortium (IMSGC) *et al.* Analysis of immune-related  
20 loci identifies 48 new susceptibility variants for multiple sclerosis. *Nature Genetics* **45**, 1353–  
21 1360 (2013).
- 22 9. Fortune, M. D. *et al.* Statistical colocalization of genetic risk variants for related autoimmune  
23 diseases in the context of common controls. *Nature Genetics* (2015). doi:10.1038/ng.3330
- 24 10. Cotsapas, C. & Hafler, D. A. Immune-mediated disease genetics: the shared basis of  
25 pathogenesis. *Trends Immunol.* **34**, 22–26 (2013).
- 26 11. Cortes, A. & Brown, M. A. Promise and pitfalls of the ImmunoChip. *Arthritis Res. Ther.* **13**, 101  
27 (2011).
- 28 12. Nicolae, D. L. *et al.* Trait-Associated SNPs Are More Likely to Be eQTLs: Annotation to Enhance  
29 Discovery from GWAS. *PLoS Genetics* **6**, e1000888 (2010).
- 30 13. Trynka, G. *et al.* Chromatin marks identify critical cell types for fine mapping complex trait  
31 variants. *Nature Genetics* **45**, 124–130 (2013).
- 32 14. Farh, K. K.-H. *et al.* Genetic and epigenetic fine mapping of causal autoimmune disease  
33 variants. *Nature* **518**, 337–343 (2015).
- 34 15. Gusev, A. *et al.* Partitioning heritability of regulatory and cell-type-specific variants across 11  
35 common diseases. *Am. J. Hum. Genet.* **95**, 535–552 (2014).
- 36 16. Finucane, H. K. *et al.* Partitioning heritability by functional annotation using genome-wide  
37 association summary statistics. *Nature Genetics* **47**, 1228–1235 (2015).
- 38 17. Solovieff, N., Cotsapas, C., Lee, P. H., Purcell, S. M. & Smoller, J. W. Pleiotropy in complex  
39 traits: challenges and strategies. *Nature Reviews Genetics* **14**, 483–495 (2013).
- 40 18. Nica, A. C. & Dermitzakis, E. T. Using gene expression to investigate the genetic basis of  
41 complex disorders. *Hum. Mol. Genet.* **17**, R129–34 (2008).
- 42 19. Giambartolomei, C. *et al.* Bayesian test for colocalisation between pairs of genetic association  
43 studies using summary statistics. *PLoS Genetics* **10**, e1004383 (2014).
- 44 20. Guo, H. *et al.* Integration of disease association and eQTL data using a Bayesian colocalisation

- 1 approach highlights six candidate causal genes in immune-mediated diseases. *Hum. Mol. Genet.* **24**, 3305–3313 (2015).
- 2
- 3 21. Zhu, Z., Zhang, F., Hu, H., Bakshi, A. & Robinson, M. R. Integration of summary data from  
4 GWAS and eQTL studies predicts complex trait gene targets. *Nature Genetics* (2016).
- 5 22. He, X. *et al.* Sherlock: detecting gene-disease associations by matching patterns of expression  
6 QTL and GWAS. *Am. J. Hum. Genet.* **92**, 667–680 (2013).
- 7 23. Lappalainen, T. *et al.* Transcriptome and genome sequencing uncovers functional variation in  
8 humans. *Nature* **501**, 506–511 (2013).
- 9 24. Raj, T. *et al.* Polarization of the effects of autoimmune and neurodegenerative risk alleles in  
10 leukocytes. *Science* **344**, 519–523 (2014).
- 11 25. Nica, A. C. *et al.* The architecture of gene regulatory variation across multiple human tissues: the  
12 MuTHER study. *PLoS Genetics* **7**, e1002003 (2011).
- 13 26. Malik, R. *et al.* Shared genetic basis for migraine and ischemic stroke: A genome-wide analysis  
14 of common variants. *Neurology* **84**, 2132–2145 (2015).
- 15 27. Winsvold, B. S. *et al.* Genetic analysis for a shared biological basis between migraine and  
16 coronary artery disease. *Neurol Genet* **1**, e10 (2015).
- 17 28. Jostins, L. *et al.* Host–microbe interactions have shaped the genetic architecture of inflammatory  
18 bowel disease. *Nature* **491**, 119–124 (2012).
- 19 29. Nica, A. C. *et al.* Candidate causal regulatory effects by integration of expression QTLs with  
20 complex trait genetic associations. *PLoS Genetics* **6**, e1000895 (2010).
- 21 30. Wallace, C. *et al.* Statistical colocalization of monocyte gene expression and genetic risk variants  
22 for type 1 diabetes. *Hum. Mol. Genet.* **21**, 2815–2824 (2012).
- 23 31. Bulik-Sullivan, B. *et al.* An atlas of genetic correlations across human diseases and traits. *Nature*  
24 *Genetics* **47**, 1236–1241 (2015).
- 25 32. de Jager, P. L. *et al.* The role of the CD58 locus in multiple sclerosis. *Proc. Natl. Acad. Sci.*  
26 *U.S.A.* **106**, 5264–5269 (2009).
- 27 33. Barrett, J. C. *et al.* Genome-wide association defines more than 30 distinct susceptibility loci for  
28 Crohn's disease. *Nature Genetics* **40**, 955–962 (2008).
- 29 34. Su, Z., Marchini, J. & Donnelly, P. HAPGEN2: simulation of multiple disease SNPs.  
30 *Bioinformatics* **27**, 2304–2305 (2011).
- 31 35. Okada, Y. *et al.* Genetics of rheumatoid arthritis contributes to biology and drug discovery.  
32 *Nature* **506**, 376–381 (2013).
- 33 36. Purcell, S. *et al.* PLINK: a tool set for whole-genome association and population-based linkage  
34 analyses. *AJHG* **81**, 559–575 (2007).
- 35 37. Price, A. L. *et al.* Principal components analysis corrects for stratification in genome-wide  
36 association studies. *Nature Genetics* **38**, 904–909 (2006).
- 37 38. Kichaev, G. *et al.* Integrating Functional Data to Prioritize Causal Variants in Statistical Fine-  
38 Mapping Studies. *PLoS Genetics* **10**, e1004722 (2014).
- 39 39. Hormozdiari, F., Kichaev, G., Yang, W.-Y., Pasaniuc, B. & Eskin, E. Identification of causal  
40 genes for complex traits. *Bioinformatics* **31**, i206–i213 (2015).
- 41 40. Storey, J. D. & Tibshirani, R. Statistical significance for genomewide studies. *Proceedings of the*  
42 *National Academy of Sciences* **100**, 9440–9445 (2003).
- 43

**Table 1. Only a minority of disease associations share causal variants with eQTLs across three immune cell subpopulations.**

We identified 261 disease associations in ImmunoChip regions with at least one eQTL within 100kb of the most associated SNP. Only 41/261 (16%) of these associations show evidence of a shared effect with an eQTL in that region. Thus, while eQTLs are abundant in disease-associated loci, they do not appear to be driven by the same causal variant as the disease association. <sup>a</sup>We only consider associations reported at genome-wide significant levels and overlapping genomic regions densely genotyped on ImmunoChip, excluding conditional peaks and MHC loci (see Methods). <sup>b</sup>eQTLs are selected if there is nominal association (eQTL  $p < 0.05$ ) to at least one SNP within 100kb of the most associated SNP to disease, and a transcription start site of the gene within 1Mb of that SNP. <sup>c</sup>Number of loci where disease association is consistent with a shared effect for at least one eQTL (FDR < 5%).

| Disease        | Number of loci                 |                           |                   |            |            |                                    |                   |           |           |
|----------------|--------------------------------|---------------------------|-------------------|------------|------------|------------------------------------|-------------------|-----------|-----------|
|                | Densely genotyped <sup>a</sup> | eQTL present <sup>b</sup> |                   |            |            | Driven by same effect <sup>c</sup> |                   |           |           |
|                |                                | CD4 <sup>+</sup>          | CD14 <sup>+</sup> | LCL        | Total      | CD4 <sup>+</sup>                   | CD14 <sup>+</sup> | LCL       | Total     |
| MS             | 59                             | 54                        | 55                | 55         | 56         | 8                                  | 3                 | 6         | 12        |
| IBD            | 69                             | 69                        | 69                | 68         | 69         | 6                                  | 9                 | 1         | 12        |
| Crohn          | 19                             | 18                        | 18                | 18         | 18         | 2                                  | 1                 | 0         | 3         |
| UC             | 10                             | 10                        | 9                 | 10         | 10         | 2                                  | 1                 | 3         | 4         |
| T1D            | 47                             | 39                        | 40                | 36         | 40         | 2                                  | 0                 | 0         | 2         |
| RA             | 34                             | 34                        | 34                | 34         | 34         | 2                                  | 0                 | 1         | 3         |
| CEL            | 34                             | 34                        | 34                | 34         | 34         | 3                                  | 2                 | 0         | 5         |
| <b>Overall</b> | <b>272</b>                     | <b>258</b>                | <b>259</b>        | <b>255</b> | <b>261</b> | <b>25</b>                          | <b>16</b>         | <b>11</b> | <b>41</b> |

**Table 2. Forty one loci harbor eQTLs driven by the same variants as an association to at least one of seven diseases.** We find 57 instances of shared disease-eQTL effects in 41 loci (joint likelihood of shared association FDR < 5%). <sup>a</sup>Variant with the minimum association *p* value to disease in the ImmunoChip summary statistics. <sup>b</sup>Minimum eQTL *p* value for any SNP within 100kb of the lead SNP. Dashes (-) indicate genes that are either not detected or with minimum eQTL *P* > 0.05 in that cell type. <sup>c</sup>Highlighted in bold are disease-eQTL pairs with false discovery rate < 5%. Asterisk (\*) marks eQTL genes passing Bonferroni correction.

| Disease | Lead SNP <sup>a</sup> | Gene            | CD4 <sup>+</sup> T cell |                               | CD14 <sup>+</sup> monocytes |                              | LCL                      |                               |
|---------|-----------------------|-----------------|-------------------------|-------------------------------|-----------------------------|------------------------------|--------------------------|-------------------------------|
|         |                       |                 | eQTL P <sup>b</sup>     | JLIM P <sup>c</sup>           | eQTL P <sup>b</sup>         | JLIM P <sup>c</sup>          | eQTL P <sup>b</sup>      | JLIM P <sup>c</sup>           |
| MS      | rs12749591            | <i>PRKCZ</i>    | -                       | -                             | -                           | -                            | 2.4 x 10 <sup>-4</sup>   | <b>5.0 x 10<sup>-4</sup></b>  |
| MS      | rs35967351            | <i>SLAMF7</i>   | 2.3 x 10 <sup>-3</sup>  | 0.27                          | 4.1 x 10 <sup>-3</sup>      | 0.94                         | 5.4 x 10 <sup>-8</sup>   | <b>&lt; 10<sup>-6</sup>*</b>  |
| MS      | rs35967351            | <i>NHLH1</i>    | 8.2 x 10 <sup>-5</sup>  | <b>3.0 x 10<sup>-6</sup>*</b> | -                           | -                            | 8.9 x 10 <sup>-3</sup>   | 0.96                          |
| MS      | rs1359062             | <i>RGS1</i>     | 0.042                   | 0.031                         | 1.6 x 10 <sup>-21</sup>     | <b>&lt; 10<sup>-6</sup>*</b> | -                        | -                             |
| MS      | rs9989735             | <i>SP140</i>    | 7.5 x 10 <sup>-13</sup> | 1.00                          | 7.0 x 10 <sup>-3</sup>      | 0.58                         | 1.3 x 10 <sup>-9</sup>   | <b>1.0 x 10<sup>-6</sup>*</b> |
| MS      | rs71624119            | <i>ANKRD55</i>  | 2.0 x 10 <sup>-10</sup> | <b>1.5 x 10<sup>-5</sup>*</b> | -                           | -                            | -                        | -                             |
| MS      | rs71624119            | <i>IL6ST</i>    | 5.9 x 10 <sup>-5</sup>  | <b>4.0 x 10<sup>-4</sup></b>  | 4.9 x 10 <sup>-4</sup>      | 0.98                         | -                        | -                             |
| MS      | rs917116              | <i>JAZF1</i>    | 6.2 x 10 <sup>-16</sup> | <b>&lt; 10<sup>-6</sup>*</b>  | 3.3 x 10 <sup>-6</sup>      | 0.90                         | 1.1 x 10 <sup>-3</sup>   | 1.00                          |
| MS      | rs60600003            | <i>ELMO1</i>    | 1.2 x 10 <sup>-8</sup>  | <b>8.0 x 10<sup>-6</sup>*</b> | 1.5 x 10 <sup>-4</sup>      | 8.0 x 10 <sup>-3</sup>       | -                        | -                             |
| MS      | rs1966115             | <i>ZC2HC1A</i>  | 4.5 x 10 <sup>-12</sup> | <b>&lt; 10<sup>-6</sup>*</b>  | 3.4 x 10 <sup>-40</sup>     | <b>&lt; 10<sup>-6</sup>*</b> | 3.4 x 10 <sup>-30</sup>  | <b>&lt; 10<sup>-6</sup>*</b>  |
| MS      | rs1966115             | <i>PKIA</i>     | 1.2 x 10 <sup>-15</sup> | 1.00                          | 0.020                       | 0.71                         | 1.1 x 10 <sup>-9</sup>   | <b>3.0 x 10<sup>-5</sup></b>  |
| MS      | rs10783847            | <i>METTL21B</i> | 8.8 x 10 <sup>-21</sup> | <b>&lt; 10<sup>-6</sup>*</b>  | 2.0 x 10 <sup>-21</sup>     | <b>&lt; 10<sup>-6</sup>*</b> | -                        | -                             |
| MS      | rs7132277             | <i>CDK2AP1</i>  | 2.1 x 10 <sup>-4</sup>  | 0.95                          | 1.3 x 10 <sup>-8</sup>      | 0.018                        | 6.5 x 10 <sup>-13</sup>  | <b>&lt; 10<sup>-6</sup>*</b>  |
| MS      | rs12946510            | <i>GSDMB</i>    | 4.1 x 10 <sup>-17</sup> | <b>&lt; 10<sup>-6</sup>*</b>  | -                           | -                            | 2.8 x 10 <sup>-4</sup>   | 0.92                          |
| MS      | rs12946510            | <i>ORMDL3</i>   | 5.7 x 10 <sup>-13</sup> | <b>&lt; 10<sup>-6</sup>*</b>  | 0.025                       | 0.63                         | 3.1 x 10 <sup>-26</sup>  | <b>1.0 x 10<sup>-6</sup>*</b> |
| MS      | rs17785991            | <i>SLC9A8</i>   | 2.2 x 10 <sup>-6</sup>  | <b>2.0 x 10<sup>-4</sup></b>  | 6.3 x 10 <sup>-9</sup>      | 1.00                         | 5.2 x 10 <sup>-3</sup>   | 0.95                          |
| IBD     | rs13001325            | <i>IL18R1</i>   | 7.2 x 10 <sup>-11</sup> | <b>7.0 x 10<sup>-6</sup>*</b> | 0.022                       | 0.71                         | 0.026                    | 0.78                          |
| IBD     | rs3749171             | <i>GPR35</i>    | 7.6 x 10 <sup>-3</sup>  | 0.92                          | 9.5 x 10 <sup>-8</sup>      | <b>3.0 x 10<sup>-4</sup></b> | 2.1 x 10 <sup>-3</sup>   | 0.76                          |
| IBD     | rs55770741            | <i>ERAP2</i>    | 2.2 x 10 <sup>-60</sup> | <b>&lt; 10<sup>-6</sup>*</b>  | 1.9 x 10 <sup>-57</sup>     | <b>&lt; 10<sup>-6</sup>*</b> | 1.1 x 10 <sup>-105</sup> | <b>&lt; 10<sup>-6</sup>*</b>  |
| IBD     | rs17622378            | <i>SHROOM1</i>  | 0.043                   | 0.62                          | 1.6 x 10 <sup>-3</sup>      | <b>2.0 x 10<sup>-4</sup></b> | 0.017                    | 0.79                          |
| IBD     | rs17622378            | <i>KIF3A</i>    | 4.0 x 10 <sup>-5</sup>  | <b>1.3 x 10<sup>-4</sup></b>  | 0.017                       | 0.30                         | -                        | -                             |
| IBD     | rs444210              | <i>RNASET2</i>  | 9.3 x 10 <sup>-51</sup> | <b>&lt; 10<sup>-6</sup>*</b>  | 3.9 x 10 <sup>-14</sup>     | 1.00                         | 9.0 x 10 <sup>-8</sup>   | 1.00                          |

|       |            |                 |                       |                                         |                       |                                         |                       |                                         |
|-------|------------|-----------------|-----------------------|-----------------------------------------|-----------------------|-----------------------------------------|-----------------------|-----------------------------------------|
| IBD   | rs7848647  | <i>TNFSF15</i>  | $1.3 \times 10^{-3}$  | 0.017                                   | $1.3 \times 10^{-16}$ | <b><math>2.0 \times 10^{-6*}</math></b> | 0.042                 | 0.087                                   |
| IBD   | rs34779708 | <i>CUL2</i>     | $2.7 \times 10^{-7}$  | <b><math>3.0 \times 10^{-5}</math></b>  | 0.034                 | 0.79                                    | $4.1 \times 10^{-3}$  | 0.76                                    |
| IBD   | rs2590348  | <i>CISD1</i>    | -                     | -                                       | $9.0 \times 10^{-13}$ | <b><math>&lt; 10^{-6*}</math></b>       | 0.045                 | 0.22                                    |
| IBD   | rs12448902 | <i>TUFM</i>     | $1.0 \times 10^{-20}$ | <b><math>&lt; 10^{-6*}</math></b>       | $5.6 \times 10^{-28}$ | <b><math>&lt; 10^{-6*}</math></b>       | 0.011                 | 0.97                                    |
| IBD   | rs9808651  | <i>ETS2</i>     | -                     | -                                       | $1.4 \times 10^{-7}$  | <b><math>3.0 \times 10^{-4}</math></b>  | -                     | -                                       |
| IBD   | rs4456788  | <i>ICOSLG</i>   | $2.9 \times 10^{-6}$  | 1.00                                    | $1.4 \times 10^{-6}$  | <b><math>5.0 \times 10^{-5}</math></b>  | $6.8 \times 10^{-4}$  | 0.97                                    |
| IBD   | rs2266961  | <i>UBE2L3</i>   | $1.0 \times 10^{-4}$  | $4.0 \times 10^{-3}$                    | $1.0 \times 10^{-9}$  | <b><math>&lt; 10^{-6*}</math></b>       | -                     | -                                       |
| Crohn | rs6752107  | <i>scaRNA5</i>  | $1.6 \times 10^{-4}$  | 0.12                                    | $1.8 \times 10^{-20}$ | <b><math>&lt; 10^{-6*}</math></b>       | -                     | -                                       |
| Crohn | rs71624119 | <i>ANKRD55</i>  | $2.0 \times 10^{-10}$ | <b><math>2.0 \times 10^{-5*}</math></b> | 0.027                 | 0.67                                    | -                     | -                                       |
| Crohn | rs71624119 | <i>IL6ST</i>    | $5.9 \times 10^{-5}$  | <b><math>5.0 \times 10^{-4}</math></b>  | $4.9 \times 10^{-4}$  | 0.89                                    | -                     | -                                       |
| Crohn | rs3801810  | <i>SKAP2</i>    | $9.7 \times 10^{-14}$ | <b><math>1.0 \times 10^{-6*}</math></b> | $7.8 \times 10^{-5}$  | 1.00                                    | -                     | -                                       |
| UC    | rs2147905  | <i>TNFRSF14</i> | $7.9 \times 10^{-3}$  | 0.43                                    | -                     | -                                       | $2.5 \times 10^{-8}$  | <b><math>3.0 \times 10^{-5*}</math></b> |
| UC    | rs11742304 | <i>TPPP</i>     | $1.0 \times 10^{-4}$  | 1.00                                    | 0.012                 | 0.70                                    | $1.5 \times 10^{-7}$  | <b><math>1.1 \times 10^{-5*}</math></b> |
| UC    | rs11150589 | <i>ITGAL</i>    | $4.2 \times 10^{-12}$ | <b><math>1.0 \times 10^{-5*}</math></b> | $6.8 \times 10^{-4}$  | 0.99                                    | 0.025                 | 0.64                                    |
| UC    | rs889561   | <i>NFAT5</i>    | $5.6 \times 10^{-3}$  | 0.90                                    | -                     | -                                       | $7.7 \times 10^{-3}$  | <b><math>2.0 \times 10^{-4}</math></b>  |
| UC    | rs889561   | <i>ZFP90</i>    | $5.9 \times 10^{-23}$ | <b><math>&lt; 10^{-6*}</math></b>       | $2.3 \times 10^{-19}$ | <b><math>&lt; 10^{-6*}</math></b>       | $5.0 \times 10^{-3}$  | 0.95                                    |
| RA    | rs4681851  | <i>FLNB</i>     | $1.1 \times 10^{-6}$  | <b><math>2.0 \times 10^{-4}</math></b>  | $3.1 \times 10^{-3}$  | 0.99                                    | $1.3 \times 10^{-3}$  | 0.90                                    |
| RA    | rs71624119 | <i>ANKRD55</i>  | $2.0 \times 10^{-10}$ | <b><math>2.0 \times 10^{-5*}</math></b> | -                     | -                                       | -                     | -                                       |
| RA    | rs71624119 | <i>IL6ST</i>    | $5.9 \times 10^{-5}$  | <b><math>3.0 \times 10^{-4}</math></b>  | $4.9 \times 10^{-4}$  | 0.93                                    | -                     | -                                       |
| RA    | rs3807306  | <i>IRF5</i>     | -                     | -                                       | $2.0 \times 10^{-4}$  | 1.00                                    | $6.7 \times 10^{-20}$ | <b><math>1.0 \times 10^{-6*}</math></b> |
| CEL   | rs1359062  | <i>RGS1</i>     | 0.042                 | 0.025                                   | $1.6 \times 10^{-21}$ | <b><math>&lt; 10^{-6*}</math></b>       | -                     | -                                       |
| CEL   | rs2097282  | <i>CCR2</i>     | $3.0 \times 10^{-5}$  | <b><math>5.0 \times 10^{-5*}</math></b> | $1.7 \times 10^{-8}$  | 1.00                                    | 0.013                 | 0.79                                    |
| CEL   | rs79758729 | <i>ELMO1</i>    | $1.2 \times 10^{-8}$  | <b><math>1.0 \times 10^{-5*}</math></b> | $4.0 \times 10^{-4}$  | 0.22                                    | -                     | -                                       |
| CEL   | rs1893592  | <i>UBASH3A</i>  | $4.5 \times 10^{-14}$ | <b><math>3.0 \times 10^{-6*}</math></b> | 0.011                 | 0.82                                    | $5.2 \times 10^{-6}$  | 1.00                                    |
| CEL   | rs4821124  | <i>UBE2L3</i>   | $1.0 \times 10^{-4}$  | $9.0 \times 10^{-3}$                    | $1.0 \times 10^{-9}$  | <b><math>2.0 \times 10^{-5*}</math></b> | -                     | -                                       |
| T1D   | rs917911   | <i>CLEC2B</i>   | $1.4 \times 10^{-5}$  | <b><math>3.0 \times 10^{-5*}</math></b> | $6.8 \times 10^{-5}$  | 0.94                                    | $1.6 \times 10^{-3}$  | 0.84                                    |
| T1D   | rs705705   | <i>SUOX</i>     | $9.3 \times 10^{-6}$  | <b><math>1.1 \times 10^{-5*}</math></b> | $1.9 \times 10^{-10}$ | 0.98                                    | $9.3 \times 10^{-3}$  | 0.085                                   |



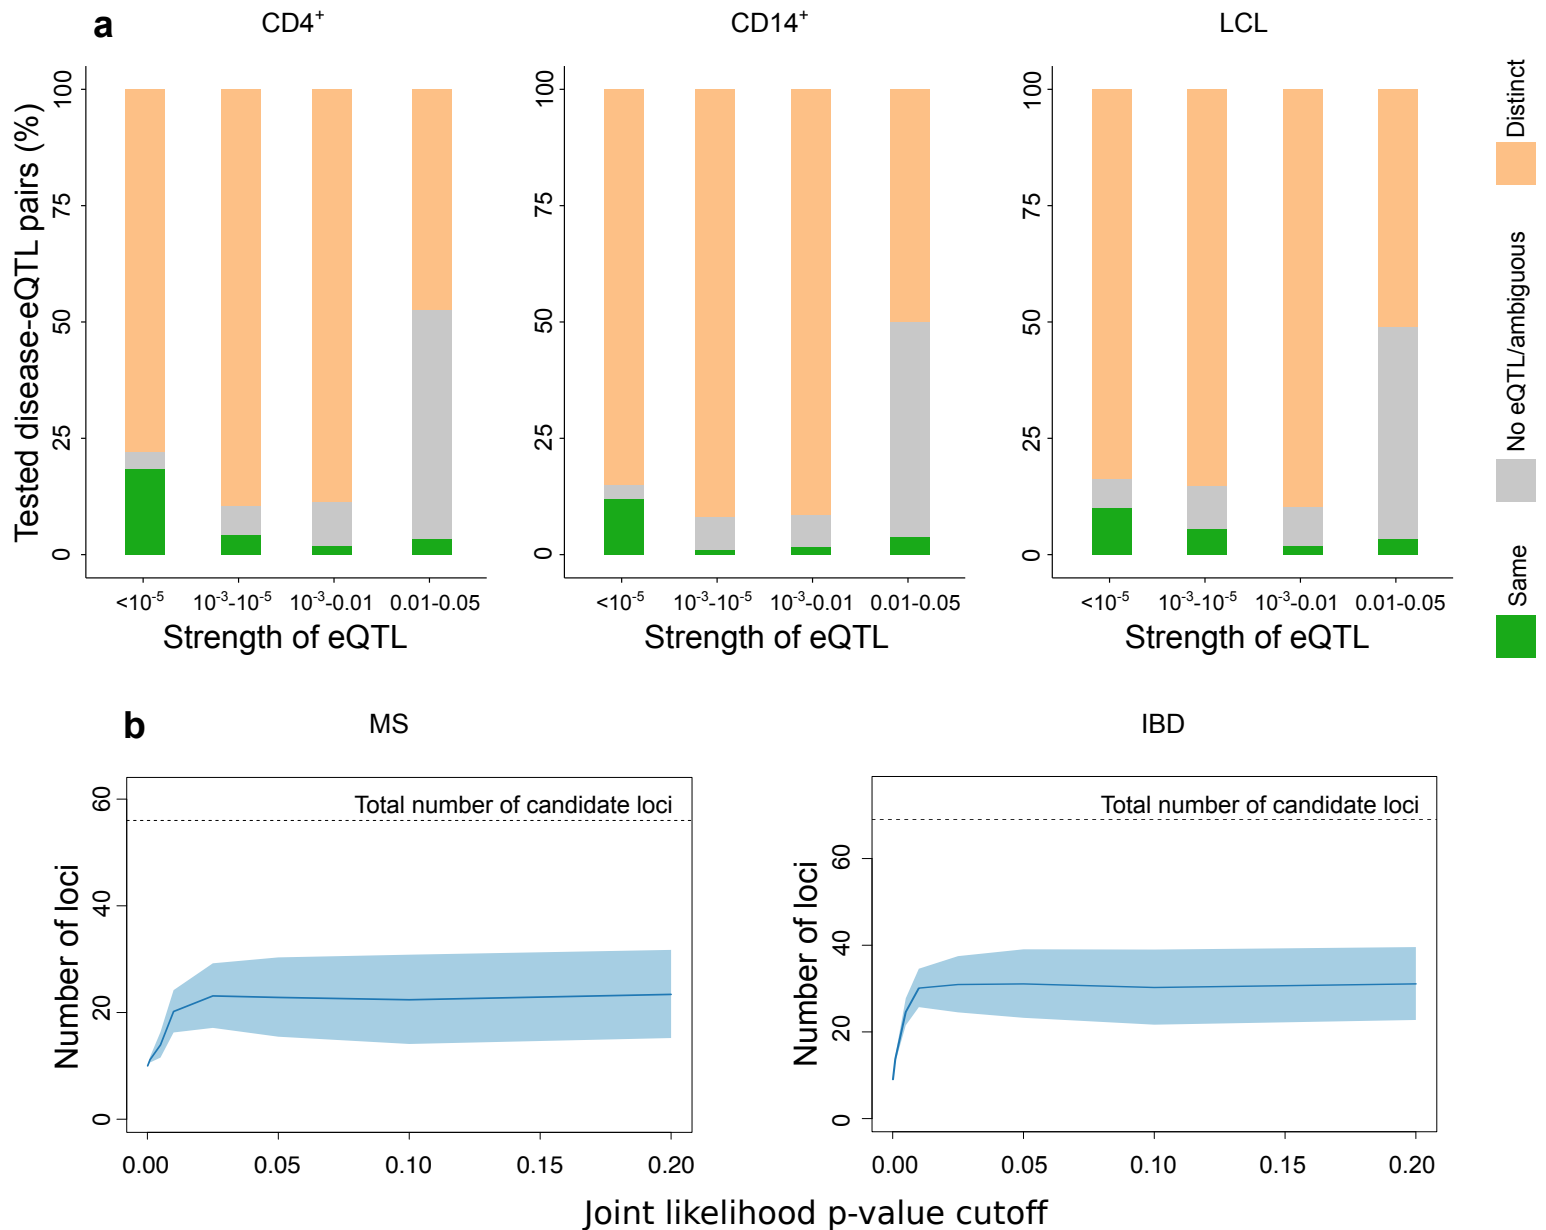

**Figure 1. Only a minority of disease associations share causal variants with eQTLs across three immune cell subpopulations.** (a) We find strong evidence that approximately 75% of eQTLs are driven by distinct causal variants (orange) to 261 disease risk associations across 155 ImmunoChip regions. The strength of eQTL association does not influence the proportion of shared effects (green) we are able to detect, suggesting this lack of overlap is not due to lack of power. We find no compelling evidence for either shared or distinct associations for a small proportion of disease-eQTL pairs (gray). (b) The median number of loci with at least one shared effect eQTL in any tissue (blue line) at more liberal significance thresholds remains constant after false positive adjustment, further supporting this conclusion. The shaded area represents the lower and upper expectation bounds for disease-eQTL pairs driven by the same causal variant. Only 31-57% of multiple sclerosis associations and 37-57% of inflammatory bowel disease associations are consistent with eQTL effects. Equivalent data for the other diseases are presented in Figure S14.

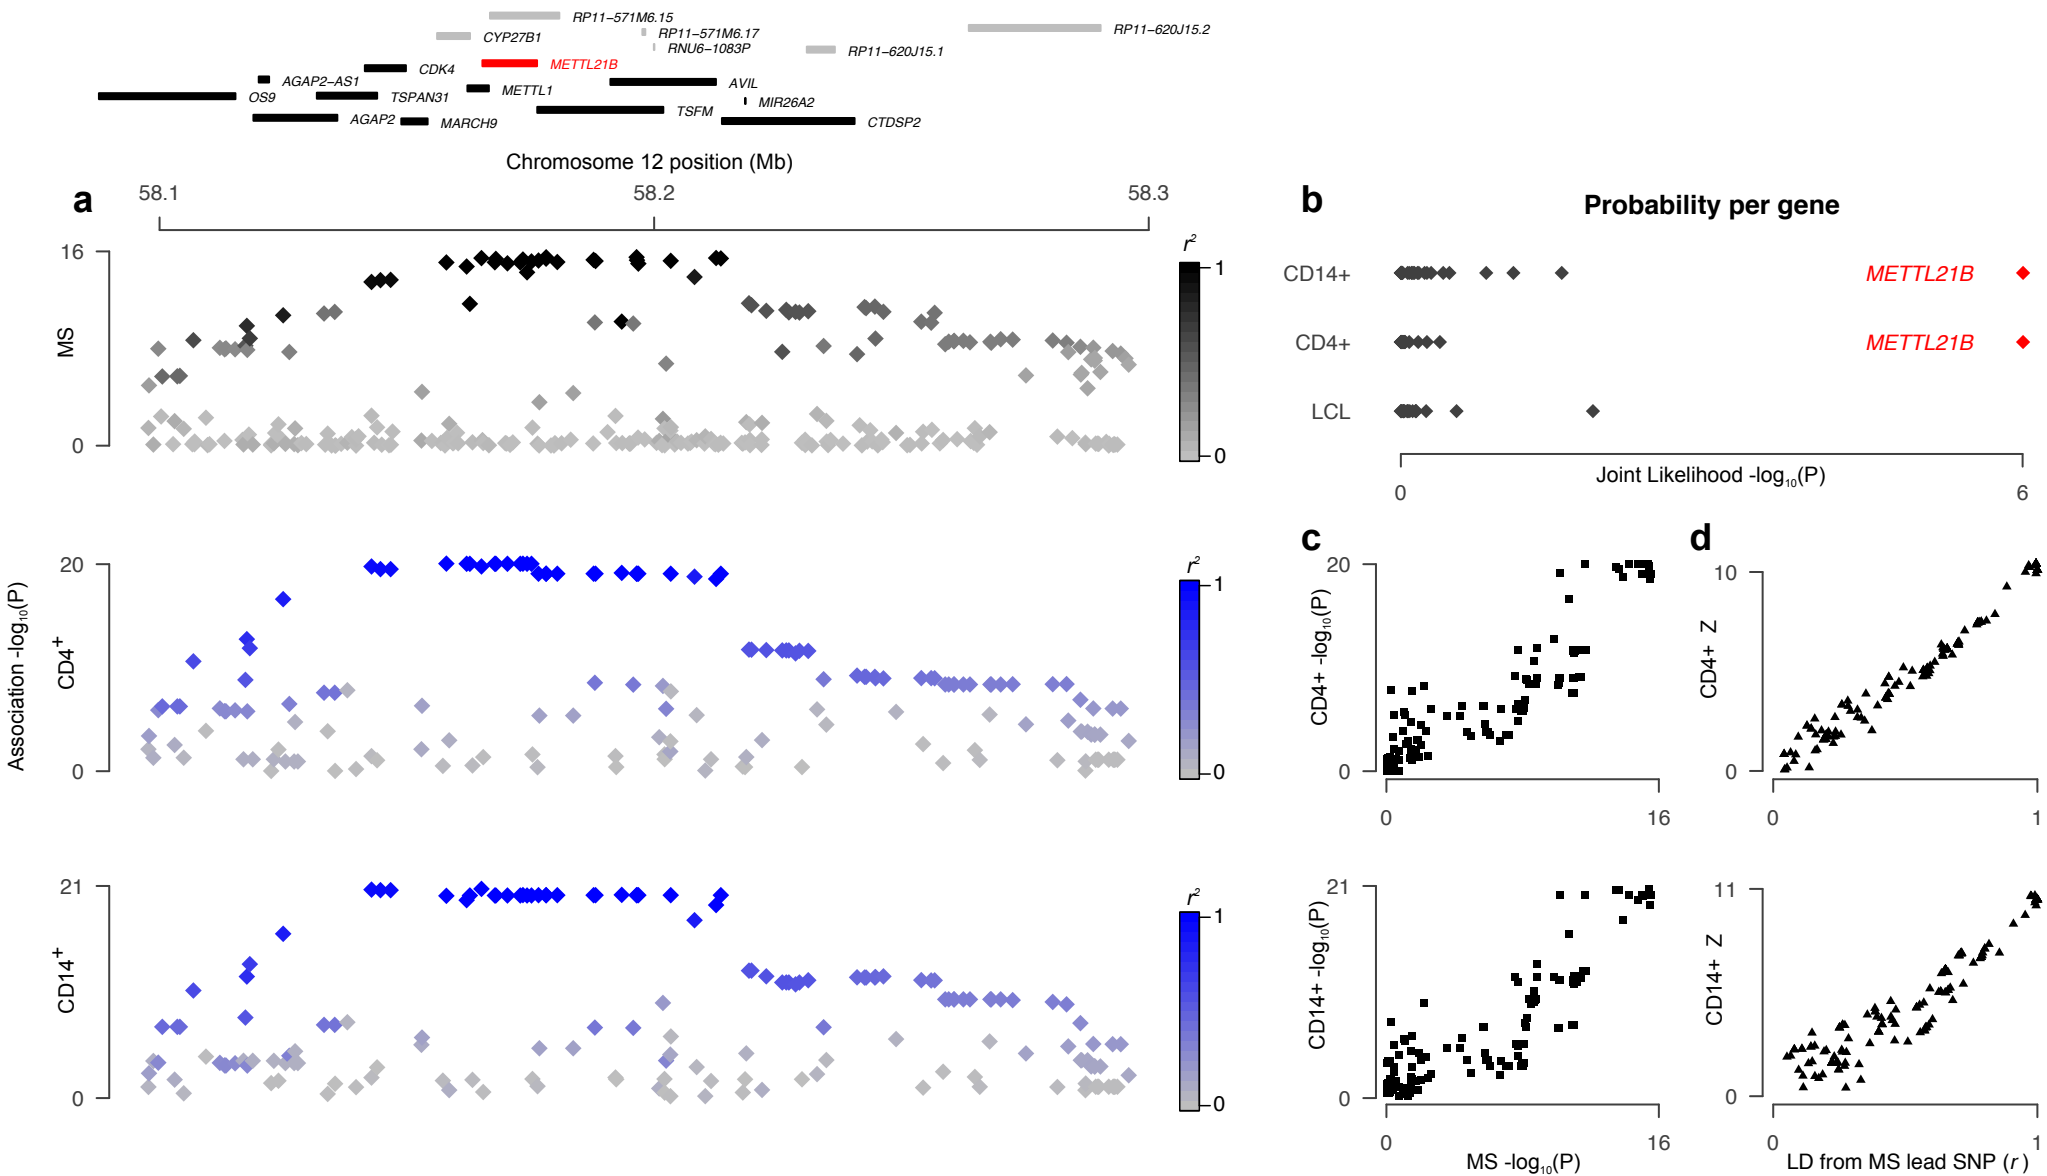

**Figure 2. A multiple sclerosis association on chromosome 12 is consistent with eQTLs for *METTL21B* in both CD4<sup>+</sup> T cells and CD14<sup>+</sup> monocytes.** (a) A genome-wide significant association to multiple sclerosis risk (upper panel; shading denotes strength of LD to the most associated variant rs10783847). This association is consistent with eQTLs for *METTL21B* in CD4<sup>+</sup> T cells (middle panel) and CD14<sup>+</sup> monocytes (lower panel, both shaded by LD to rs10783847), but not to eQTL data for any other genes in the region (upper gene track: black boxes denote 38 genes with eQTL data available in addition to *METTL21B* (red); gray denotes genes which are not reliably detected in our data or do not have eQTL  $p < 0.05$  in the region). (b) Joint likelihood p-values for 39 candidate genes analyzed for this MS association peak in three cell types. Those with FDR < 5% are shown in red. (c) Association p-values for MS risk (x-axis) and eQTLs (y-axis) are strongly correlated for both CD4<sup>+</sup> T cells (middle panel) and CD14<sup>+</sup> monocytes (lower panel). (d) Similarly, eQTL association Z statistics scale linearly with LD ( $r$ , x axis) to rs10783847, consistent with a model of a single causal variant driving both disease association and eQTL.



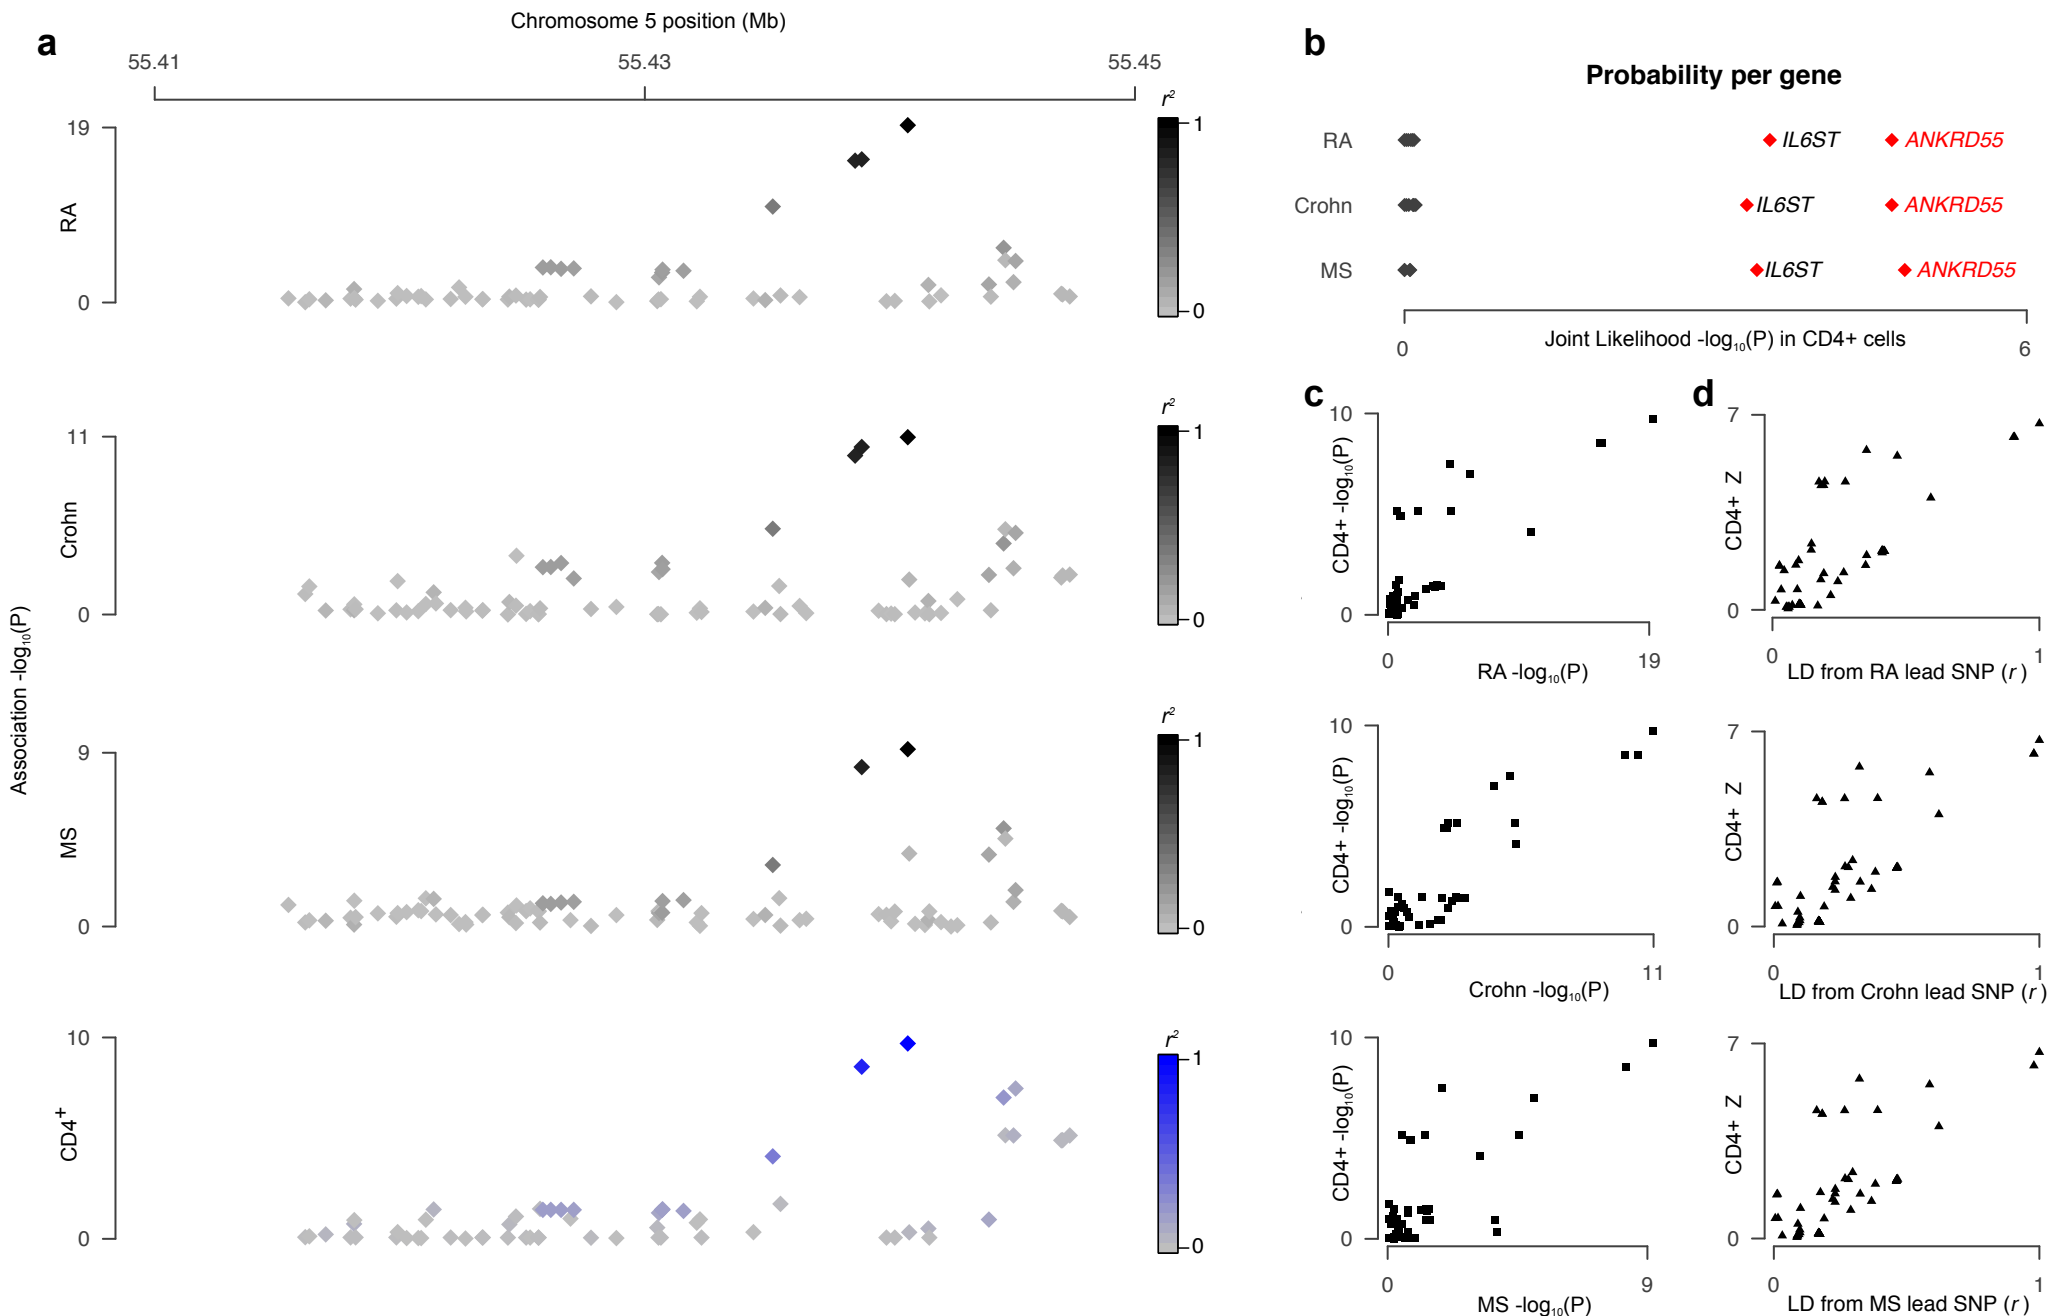

**Figure 3. Associations to multiple sclerosis, Crohn disease and rheumatoid arthritis (RA) on chromosome 5 are consistent with an eQTL for *ANKRD55* in CD4<sup>+</sup> T cells.** (a) Genome-wide significant associations to all three diseases (upper panels) and eQTL data for *ANKRD55* (lower panel; shading in all panels proportional to LD to the most associated variant rs71624119). Due to the variable density of ImmunoChip data, the analysis window is small and only overlaps the coding region of *ANKRD55*, though we test eQTLs for 11 genes with a transcriptional start site within 1Mb of the the association. (b) Joint likelihood p-values for nine candidate genes analyzed for this locus in CD4<sup>+</sup> T cells. Those with FDR < 5% are shown in red. (c) Association p-values for each disease (x axis) are strongly correlated to those for the *ANKRD55* eQTL in CD4<sup>+</sup> cells (y axis). (d) Similarly, eQTL association Z statistics scale linearly with LD ( $r$ , x axis) to rs71624119 for all three diseases, consistent with a model of a single causal variant driving all disease associations and the eQTL.
